# Supplementary material for: Tailored PGE2 Immunomodulation of moDCs by Nano-Encapsulated EP2/EP4 Antagonists
Source: MDPI journal article supplement (doi:10.3390/ijms24021392), 2023-01-11
Supplement: s1 [file s1]

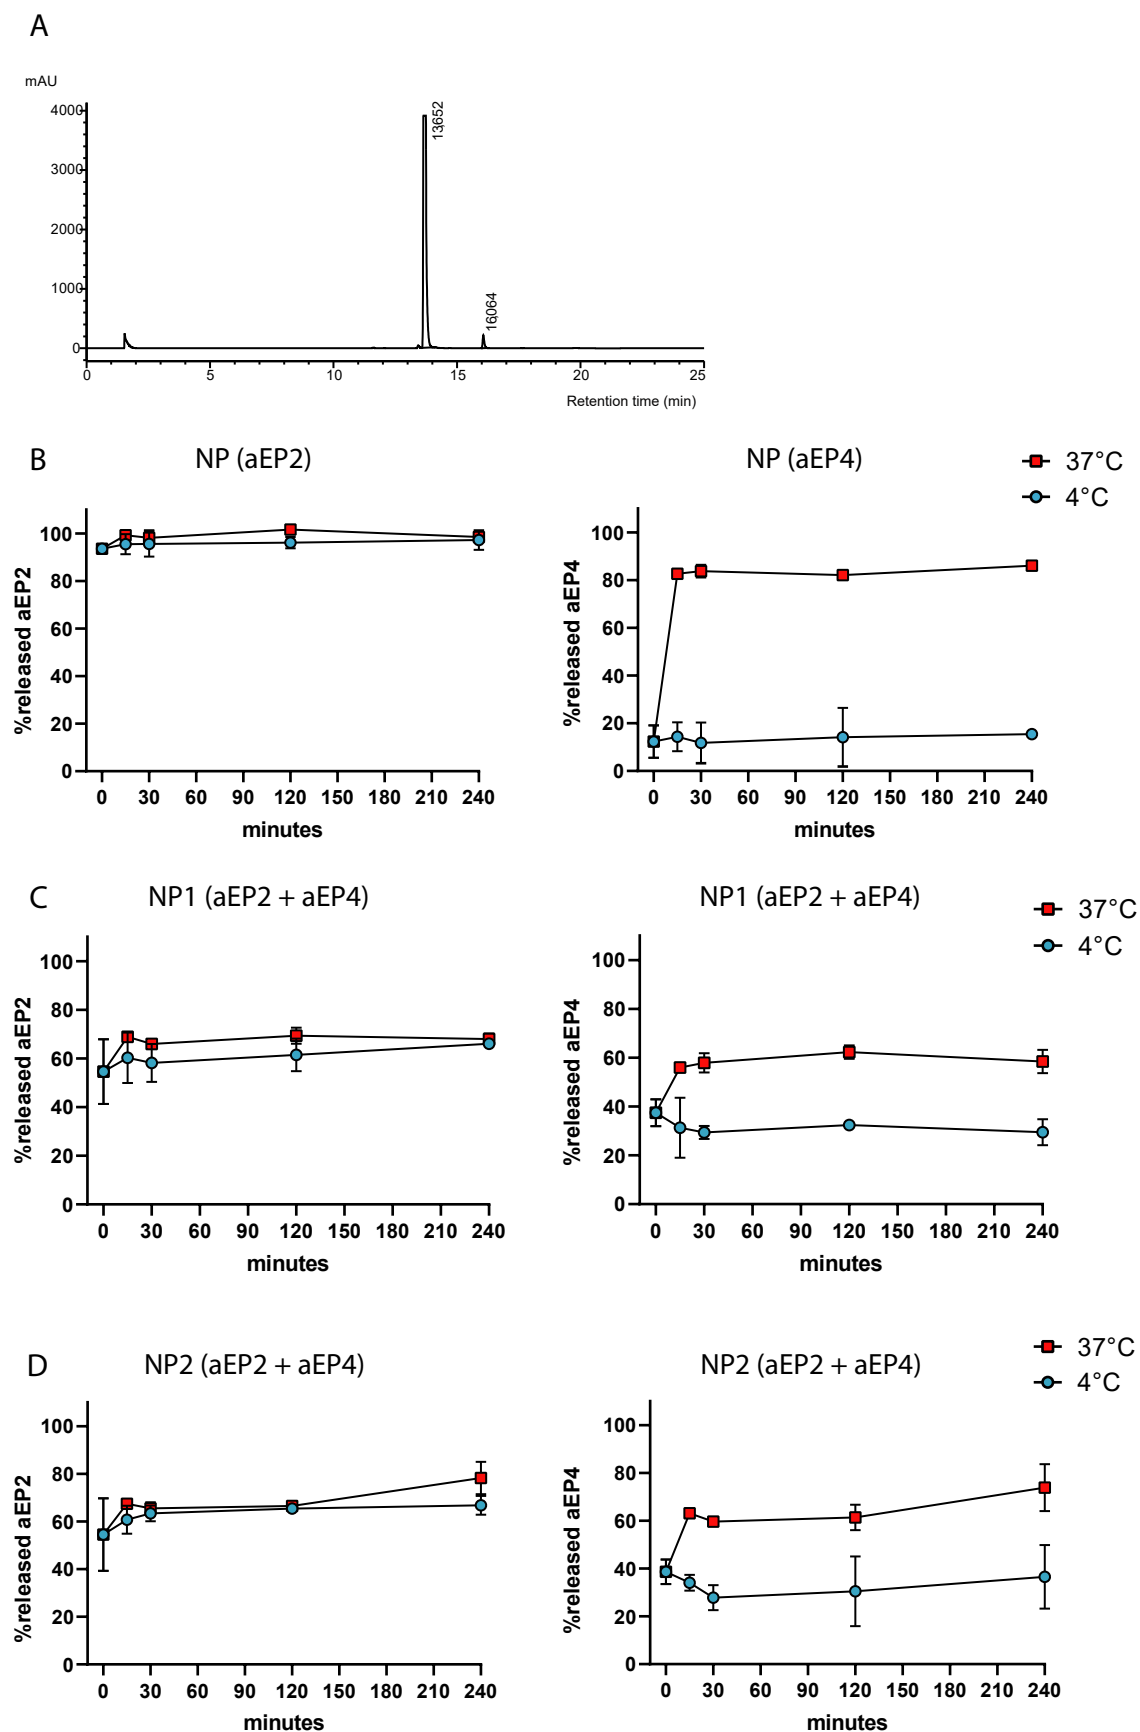

Figure S1: Nanoparticle characterization. (A) HPLC detection of aEP2 and aEP4. Percentage of released aEP2 and aEP4 from (B) NP (aEP2) NP (aEP4), (C) NP1 (aEP2 + aEP4), and (D) NP2 (aEP2 + aEP4) over 240 minutes at 37 °C (red) or 4 °C (blue). Each value represents mean  $\pm$  SD of  $n \geq 2$  NP batches.
