# Supplementary material for: Tailored PGE2 Immunomodulation of moDCs by Nano-Encapsulated EP2/EP4 Antagonists
Source: Int J Mol Sci. 2023 Jan 11;24(2):1392. doi: 10.3390/ijms24021392 (PMC9866164; doi:10.3390/ijms24021392)
Supplement: Supplementary file 1 [file ijms-24-01392-s001.zip]

Archive with 6 entries (6 files):
- Sup Figure S1.pdf
- Sup Figure S2.pdf
- Sup Figure S3.pdf
- Sup Figure S4.pdf
- Sup Figure S5.pdf
- Sup Figure S6.pdf
